# Supplementary material for: Investigation of the Effect of Type 2 Diabetes Mellitus on Subgingival Plaque Microbiota by High-Throughput 16S rDNA Pyrosequencing
Source: PLoS One. 2013 Apr 22;8(4):e61516. doi: 10.1371/journal.pone.0061516 (PMC3632544; doi:10.1371/journal.pone.0061516)
Supplement: Table S1 — Clinical parameters of the participant subjects. Each subject was given an ID (column 1) and assigned a group according to periodontitis and diabetes statuses. Gender and age were recorded. Probing depth (PD) indicates the average depth in millimeters of the four deepest periodontal pockets. Attachment loss (AL) indicates the average tooth support tissue loss in millimeters of the same four sites. For subjects with diabetes, fasting blood sugar (FBS), two-hour postprandial blood sugar (PBS), and glycosylated hemoglobin, the three-month average glucose level (HbA1c), were recorded. (XLSX) [file pone.0061516.s002.xlsx]

## Sheet: Clinical Parameters
ID	Group	Periodontitis	Diabetes	Gender	Age	FBS	PBS	HbA1c	PD	AL
K1	P-D-	P-	D-	Female	43				2	0
K2	P-D-	P-	D-	Male	39				2	0
K3	P-D-	P-	D-	Female	39				1.5	0
K4	P-D-	P-	D-	Male	40				1	0
K5	P-D-	P-	D-	Male	36				1	0
L11	P-D+	P-	D+	Male	35	7.3	8.9	6.4	2	0
L12	P+D+	P+	D+	Female	51	9.9	16	6.7	5	2
L13	P-D+	P-	D+	Female	33	9.5	14.2	10.2	1	0
L14	P-D+	P-	D+	Female	53	8.7	14.6	7.4	1.5	0
L15	P+D+	P+	D+	Female	58	22.8	30	17.4	5	3
L16	P+D+	P+	D+	Female	60	7.8	12.2	7	5	2
L17	P+D+	P+	D+	Male	44	7.5	12.7	6.5	5	2
L18	P+D+	P+	D+	Female	51	7.5	13.5	8.9	6	2
L19	P+D+	P+	D+	Male	43	10.2	15	7.4	5.5	2
L2	P-D+	P-	D+	Female	54	6.5	8.6	6.7	1.5	0
L20	P-D+	P-	D+	Male	46	7	8.2	6.7	1	0
L21	P-D+	P-	D+	Female	56	7.02	9.3	6.6	2	0
L22	P+D+	P+	D+	Male	43	6.9	7.4	6.5	6.5	3
L23	P+D+	P+	D+	Female	52	7.5	9.5	7	7.5	2
L3	P+D+	P+	D+	Male	39	7.4	12.8	6.9	5	2.5
L5	P+D+	P+	D+	Female	60	7.3	13.4	6.4	7	3
L6	P+D+	P+	D+	Female	52	8.3	12	7.2	5	2
L7	P-D+	P-	D+	Male	63	11.8	14.3	7.9	1	0
L8	P-D+	P-	D+	Female	51	8.1	9.6	6.2	1.5	0
L9	P+D+	P+	D+	Male	44	8.1	13	6.4	6	2.5
P1	P+D-	P+	D-	Male	53				8	3
P2	P+D-	P+	D-	Male	38				6	2
P3	P+D-	P+	D-	Female	49				6	2
P4	P+D-	P+	D-	Female	57				5	2
P5	P+D-	P+	D-	Female	43				5	2.5
P6	P+D-	P+	D-	Male	39				6	0
