# Supplementary material for: Investigation of the Effect of Type 2 Diabetes Mellitus on Subgingival Plaque Microbiota by High-Throughput 16S rDNA Pyrosequencing
Source: PLoS One. 2013 Apr 22;8(4):e61516. doi: 10.1371/journal.pone.0061516 (PMC3632544; doi:10.1371/journal.pone.0061516)
Supplement: Table S2 — Classification of all signature OTUs. These signature OTUs had significantly different abundances or prevalence in at least one of the following sample group comparisons: P−D− vs. P+D−, P−D+ vs. P+D+, P−D− vs. P−D+, or P+D− vs. P+D+ (see figure S1 for the distribution of the signature OTUs). Any significant (p<0.05) Wilcoxon rank-sum test or Fisher's exact test p-values are stated in the corresponding column. For the two comparisons of periodontal health, the “Association with periodontal health of subjects” column indicates whether the OTU is enriched in the periodontitis-negative or periodontitis-positive samples of that comparison. Similarly for the two comparisons of diabetes status, the “Association with diabetes status of subjects” column indicates the sample group with the higher abundances for that OTU. (XLSX) [file pone.0061516.s003.xlsx]

## Sheet: Sheet1
OTU	Phylum	Class	Order	Family	Genus	Species	Association with periodontal health of subjects	P-D- vs. P+D- significance	P-D+ vs. P+D+ significance	Association with diabetes status of subjects	P-D- vs. P-D+ significance	P+D- vs. P+D+ significance
Otu0001	Bacteroidetes	Bacteroidia	Bacteroidales	Porphyromonadaceae	Porphyromonas	Porphyromonas gingivalis ATCC 33277 strain	periodontitis	-	significant (Wilcoxon: 0.013473345)	-	-	-
Otu0003	Actinobacteria	Actinobacteria	Actinomycetales	Corynebacteriaceae	Corynebacterium	Corynebacterium matruchotii strain CIP 81.82	healthy	significant (Wilcoxon: 0.006735947)	-	non-diabetic	significant (Wilcoxon: 0.047825261)	-
Otu0004	Fusobacteria	Fusobacteria	Fusobacteriales	Leptotrichiaceae	Leptotrichia	Leptotrichia hofstadii strain LB23	periodontitis	-	significant (Fisher's exact: 0.019766611, Wilcoxon: 0.010604607)	-	-	-
Otu0009	Bacteroidetes	Bacteroidia	Bacteroidales	unclassified	unclassified	unclassified	periodontitis	-	significant (Fisher's exact: 0.000722394, Wilcoxon: 0.003367604)	-	-	-
Otu0010	Bacteroidetes	Bacteroidia	Bacteroidales	Porphyromonadaceae	Tannerella	Tannerella forsythia strain ATCC43037	periodontitis	-	significant (Fisher's exact: 0.000722394, Wilcoxon: 0.000374369)	diabetic	-	significant (Fisher's exact: 0.024509804)
Otu0011	Spirochaetes	Spirochaetes	Spirochaetales	Spirochaetaceae	Treponema	Treponema denticola strain	periodontitis	significant (Wilcoxon: 0.035344328)	significant (Fisher's exact: 0.000722394, Wilcoxon: 0.000374369)	-	-	-
Otu0015	Proteobacteria	Betaproteobacteria	Burkholderiales	unclassified	unclassified	unclassified	-	-	-	diabetic	-	significant (Fisher's exact: 0.021708683, Wilcoxon: 0.041874261)
Otu0016	Actinobacteria	Actinobacteria	Actinomycetales	Propionibacteriaceae	unclassified	unclassified	healthy	significant (Wilcoxon: 0.034094293)	-	diabetic	-	significant (Wilcoxon: 0.035839799)
Otu0017	unclassified	unclassified	unclassified	unclassified	unclassified	unclassified	periodontitis	-	significant (Fisher's exact: 0.000770025, Wilcoxon: 0.000814514)	-	-	-
Otu0019	Proteobacteria	Betaproteobacteria	Neisseriales	Neisseriaceae	Neisseria	Neisseria elongata subsp. elongata strain ATCC 25295	healthy	-	significant (Wilcoxon: 0.027655653)	-	-	-
Otu0020	Bacteroidetes	Bacteroidia	Bacteroidales	Prevotellaceae	Prevotella	Prevotella loescheii strain NCTC 11321	healthy	significant (Wilcoxon: 0.004329004)	-	non-diabetic	significant (Wilcoxon: 0.006466734)	-
Otu0025	Proteobacteria	Gammaproteobacteria	Pasteurellales	Pasteurellaceae	Aggregatibacter	Aggregatibacter aphrophilus ATCC 33389 strain CCUG 3715	healthy	significant (Fisher's exact: 0.002164502, Wilcoxon: 0.003890487)	-	-	-	-
Otu0026	Firmicutes	Clostridia	Clostridiales	Veillonellaceae	Selenomonas	Selenomonas noxia strain ATCC 43541	healthy	significant (Wilcoxon: 0.031633423)	-	-	-	-
Otu0028	Actinobacteria	Actinobacteria	Actinomycetales	Micrococcaceae	Rothia	Rothia dentocariosa ATCC 17931/Rothia aeria strain A1-17B	healthy	-	significant (Wilcoxon: 0.002405998)	-	-	-
Otu0044	Bacteroidetes	Bacteroidia	Bacteroidales	Porphyromonadaceae	Porphyromonas	unclassified	periodontitis	-	significant (Fisher's exact: 0.004524887, Wilcoxon: 0.002419264)	-	-	-
Otu0046	Bacteroidetes	Bacteroidia	Bacteroidales	Prevotellaceae	Prevotella	Prevotella tannerae strain VPI N14B-15	-	-	-	non-diabetic	-	significant (Fisher's exact: 0.009049774, Wilcoxon: 0.010725992)
Otu0052	Firmicutes	Bacilli	Lactobacillales	Streptococcaceae	Streptococcus	Streptococcus mitis strain NS51	healthy	significant (Wilcoxon: 0.031633423)	significant (Wilcoxon: 0.009207933)	-	-	-
Otu0056	unclassified	unclassified	unclassified	unclassified	unclassified	unclassified	periodontitis	-	significant (Fisher's exact: 0.000714456, Wilcoxon: 0.001129314)	-	-	-
Otu0058	Firmicutes	Clostridia	Clostridiales	Peptostreptococcaceae	Filifactor	unclassified	periodontitis	-	significant (Fisher's exact: 0.004524887, Wilcoxon: 0.004085456)	-	-	-
Otu0088	Proteobacteria	Gammaproteobacteria	Cardiobacteriales	Cardiobacteriaceae	Cardiobacterium	Cardiobacterium hominis strain 6573	healthy	significant (Fisher's exact: 0.002164502, Wilcoxon: 0.003890487)	-	-	-	-
Otu0094	Proteobacteria	Betaproteobacteria	Neisseriales	Neisseriaceae	Neisseria	Neisseria flavescens strain N 155	healthy	significant (Wilcoxon: 0.046484119)	-	non-diabetic	significant (Fisher's exact: 0.031857032)	-
Otu0096	Proteobacteria	Gammaproteobacteria	Cardiobacteriales	Cardiobacteriaceae	Cardiobacterium	Cardiobacterium valvarum strain MDA3079	healthy	significant (Fisher's exact: 0.015151515, Wilcoxon: 0.005494111)	-	non-diabetic	significant (Wilcoxon: 0.045079096)	-
Otu0101	Fusobacteria	Fusobacteria	Fusobacteriales	Leptotrichiaceae	Leptotrichia	Leptotrichia wadei strain LB16	periodontitis	-	significant (Fisher's exact: 0.041898865, Wilcoxon: 0.025397931)	-	-	-
Otu0102	Fusobacteria	Fusobacteria	Fusobacteriales	Leptotrichiaceae	unclassified	unclassified	healthy	significant (Fisher's exact: 0.002164502, Wilcoxon: 0.003890487)	-	non-diabetic	significant (Wilcoxon: 0.033544554)	-
Otu0125	Actinobacteria	Actinobacteria	Actinomycetales	unclassified	unclassified	unclassified	-	-	-	diabetic	significant (Wilcoxon: 0.025975828)	-
Otu0127	Fusobacteria	Fusobacteria	Fusobacteriales	Leptotrichiaceae	Leptotrichia	Leptotrichia trevisanii strain 'WeeTee'	healthy	significant (Wilcoxon: 0.048406019)	-	-	-	-
Otu0161	Bacteroidetes	Flavobacteria	Flavobacteriales	Flavobacteriaceae	Capnocytophaga	Capnocytophaga sputigena strain ATCC 33612	healthy	significant (Fisher's exact: 0.015151515, Wilcoxon: 0.016685399)	-	diabetic	-	significant (Fisher's exact: 0.042986425, Wilcoxon: 0.014282991)
Otu0187	Bacteroidetes	Flavobacteria	Flavobacteriales	Flavobacteriaceae	Capnocytophaga	Capnocytophaga ochracea DSM 7271	-	-	-	non-diabetic	significant (Fisher's exact: 0.031857032, Wilcoxon: 0.030025055)	-
Otu0193	Bacteroidetes	Bacteroidia	Bacteroidales	Prevotellaceae	Prevotella	Prevotella marshii DSM 16973 strain E9.34	-	-	-	non-diabetic	significant (Fisher's exact: 0.031857032, Wilcoxon: 0.019456647)	-
Otu0194	Firmicutes	Clostridia	Clostridiales	Veillonellaceae	Veillonella	Veillonella dispar/Veillonella parvula DSM 2008 strain ATCC	healthy	-	significant (Wilcoxon: 0.000541464)	-	-	-
Otu0214	Proteobacteria	Gammaproteobacteria	Pasteurellales	Pasteurellaceae	Haemophilus	Haemophilus parainfluenzae ATCC	healthy	-	significant (Wilcoxon: 0.009412902)	-	-	-
Otu0280	Proteobacteria	Betaproteobacteria	Neisseriales	Neisseriaceae	Neisseria	Neisseria subflava strain U37	healthy	-	significant (Wilcoxon: 0.008271682)	diabetic	significant (Wilcoxon: 0.01754842)	-
Otu0343	Bacteroidetes	Bacteroidia	Bacteroidales	Prevotellaceae	unclassified	unclassified	periodontitis	significant (Wilcoxon: 0.027659492)	significant (Fisher's exact: 0.041898865, Wilcoxon: 0.025397931)	non-diabetic	-	significant (Wilcoxon: 0.04792786)
Otu0507	Bacteroidetes	Bacteroidia	Bacteroidales	Prevotellaceae	unclassified	unclassified	periodontitis	significant (Wilcoxon: 0.044550647)	-	-	-	-
Otu2001	Firmicutes	Clostridia	Clostridiales	Veillonellaceae	Selenomonas	Selenomonas sputigena	periodontitis	significant (Wilcoxon: 0.00865801)	-	-	-	-
Otu2002	Firmicutes	Bacilli	Lactobacillales	Streptococcaceae	Streptococcus	Streptococcus gordonii	healthy	significant (Wilcoxon: 0.00754623)	significant (Fisher's exact: 0.001381281, Wilcoxon: 0.002272583)	-	-	-
Otu2003	Spirochaetes	Spirochaetes	Spirochaetales	Spirochaetaceae	Treponema	Treponema medium	periodontitis	-	significant (Fisher's exact: 0.000722394, Wilcoxon: 0.000890674)	-	-	-
Otu2004	Bacteroidetes	Bacteroidia	Bacteroidales	Porphyromonadaceae	Porphyromonas	Porphyromonas catoniae	healthy	significant (Wilcoxon: 0.049745991)	-	-	-	-
Otu2005	Actinobacteria	Actinobacteria	Actinomycetales	Actinomycetaceae	Actinomyces	Actinomyces naeslundii	healthy	significant (Fisher's exact: 0.015151515, Wilcoxon: 0.015024285)	significant (Fisher's exact: 0.014654283, Wilcoxon: 0.000451669)	-	-	-
Otu2006	Bacteroidetes	Bacteroidia	Bacteroidales	Prevotellaceae	Prevotella	Prevotella intermedia	periodontitis	significant (Wilcoxon: 0.03030303)	significant (Wilcoxon: 0.00276315)	-	-	-
